# Supplementary material
Source: Springer Nature journal article supplement (https://www.springermedizin.de/resource/supplementary/12874_2010_602_MOESM2_ESM.pdf/9432568)
Supplement: MOESM2 [file 9432568]

|                                      |                | <b>First medication application</b> |                           |
|--------------------------------------|----------------|-------------------------------------|---------------------------|
|                                      |                | <b>drug</b>                         | <b>placebo</b>            |
| <b>Second medication application</b> | <b>drug</b>    | <i>1: drug - drug</i>               | <i>2: placebo - drug</i>  |
|                                      | <b>placebo</b> | <i>3: drug - placebo</i>            | <i>4: placebo placebo</i> |
